# Supplementary material
Source: publisher figshare collection journal article supplement (https://acs.figshare.com/ndownloader/files/24889004)
Supplement: Supplementary file 1 [file 24889004]

**Supporting Information for:**

Condensed Film Formation and Molecular Packing in Cationic Surfactant – Cholesterol and  
Zwitterionic Surfactant – Cholesterol Systems at the Hexane/Water Interface

*Ayumi Yamakawa,<sup>#</sup> Haruna Hayase,<sup>#</sup> Shinya Hiraki,<sup>#</sup> Yosuke Imai,<sup>\$</sup> Toshiaki Ina,<sup>\$</sup>  
Kiyofumi Nitta,<sup>\$</sup> Hajime Tanida,<sup>\$</sup> Tomoya Uruga,<sup>\$</sup> and Takanori Takiue<sup>\*,#,\$</sup>*

*<sup>#</sup> Department of Chemistry, Faculty of Science, Kyushu University, Fukuoka 819-0395, Japan*

*<sup>§</sup> Faculty of Arts and Science, Kyushu University, Fukuoka 819-0395, Japan*

*<sup>\$</sup> Japan Synchrotron Radiation Research Institute, Hyogo 678-5198, Japan*

E-mail : t.takiue@chem.kyushu-univ.jp

Phone : +81 92 802 6023

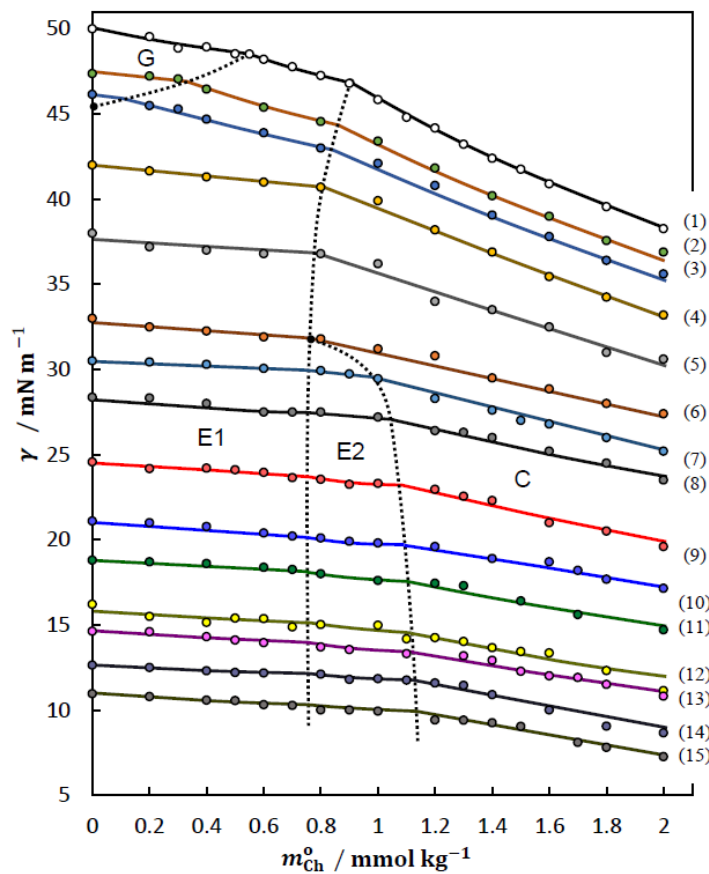

**Figure S1.** Interfacial tension vs. cholesterol concentration curves at constant C14PC concentration:  $m_{PC} =$  (1) 0  $\text{mmol kg}^{-1}$ , (2) 0.001, (3) 0.0015, (4) 0.002, (5) 0.003, (6) 0.004, (7) 0.005, (8) 0.007, (9) 0.01, (10) 0.015, (11) 0.02, (12) 0.03, (13) 0.04, (14) 0.05, (15) 0.06. The dotted lines connect the break points on the interfacial tension vs. concentration curves at phase transition points.

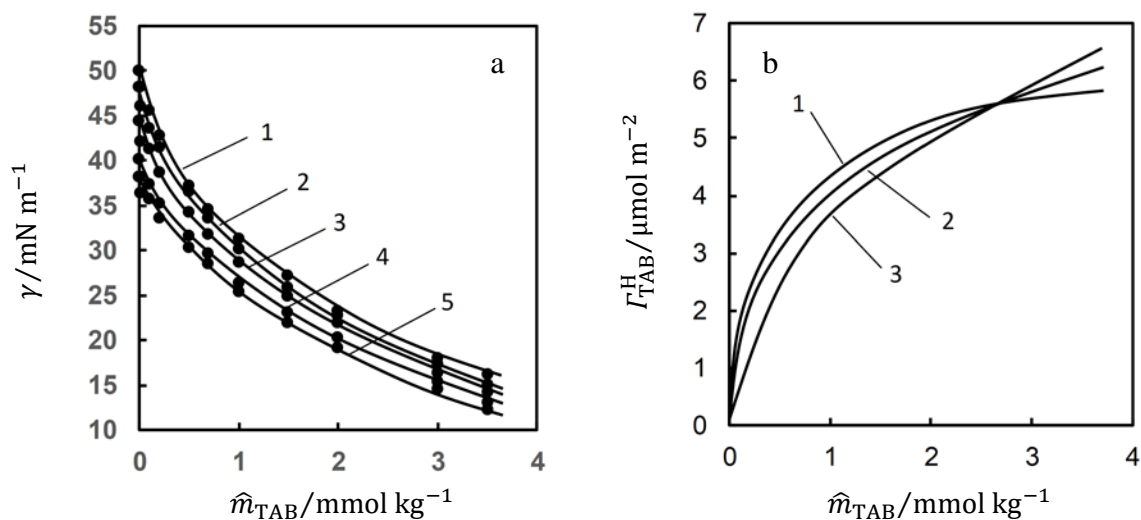

**Figure S2.** (a) Interfacial tension vs. C14TAB concentration curves at 298.15 K and constant Chol concentration:  $m_{\text{Chol}} = (1) 0 \text{ mmol kg}^{-1}$ , (2) 0.6, (3) 1.2, (4) 1.8, (5) 2.1; (b) Interfacial density of C14TAB vs. C14TAB concentration curves at 298.15 K and constant Chol concentration:  $m_{\text{Chol}} = (1) 0 \text{ mmol kg}^{-1}$ , (2) 0.9, (3) 1.5.

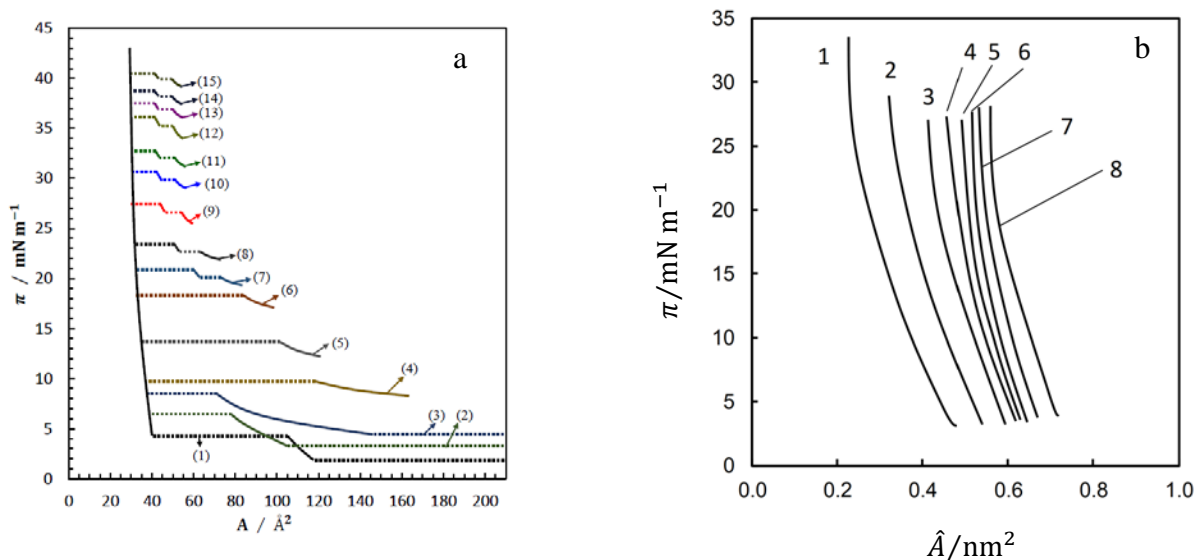

**Figure S3.** (a) Interfacial pressure vs. mean area per molecule curves of C14PC – Chol system at constant  $m_{\text{PC}} = (1) 0 \text{ mmol kg}^{-1}$ , (4) 0.003, (5) 0.004, (6) 0.005, (7) 0.007, (8) 0.01, (9) 0.015, (11) 0.03, (13) 0.05, (15) 0.06; (b) Interfacial pressure vs. mean area per molecule curves of C14TAB – C14PC system at constant bulk composition  $\hat{X}_{\text{PC}} = (1) 0$  (C14TAB), (2) 0.02, (3) 0.1, (4) 0.023, (5) 0.5, (6) 0.74, (7) 0.9, (8) 1 (C14PC).

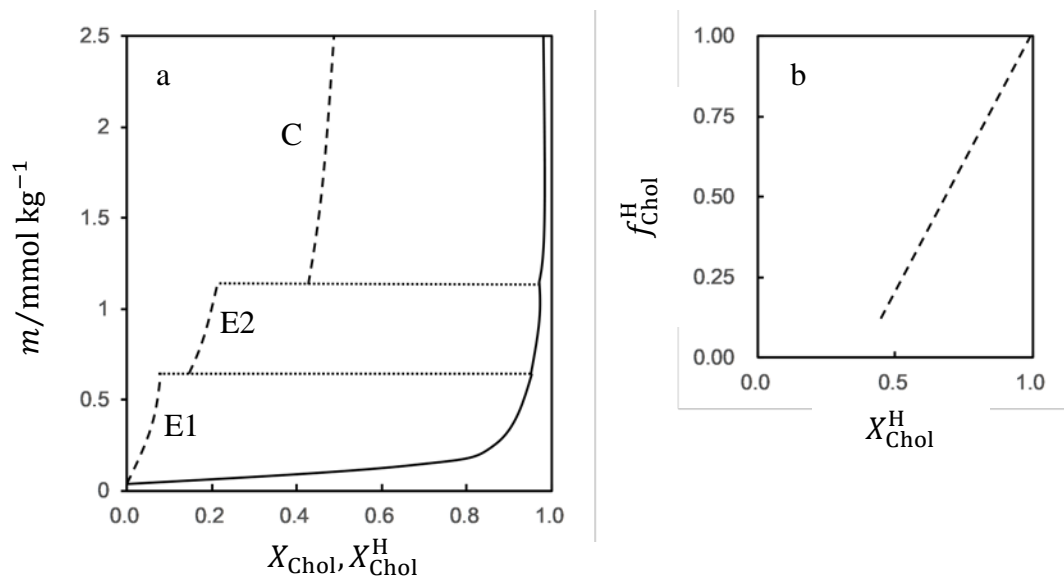

**Figure S4.** (a) Phase diagram of adsorption of C14PC – Chol system at  $\gamma = 15 \text{ mN m}^{-1}$ . Solid and dashed lines represent respectively  $m$  vs.  $X_{\text{Chol}}$  and  $m$  vs.  $X_{\text{Chol}}^{\text{H}}$  curves; (b) Activity coefficient of Chol in condensed state (C state) at  $\gamma = 15 \text{ mN m}^{-1}$ .

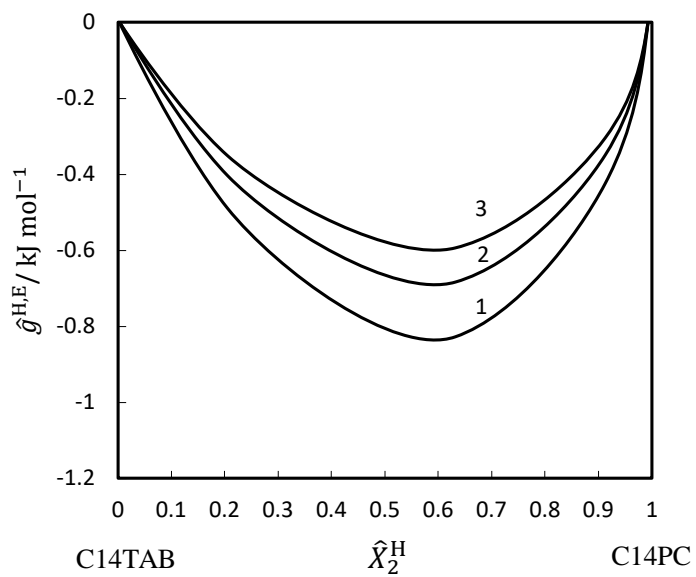

**Figure S5.** Excess Gibbs energy of adsorbed film vs. film composition curves of C14TAB – C14PC system at given interfacial tension  $\gamma = (1) 46 \text{ mN m}^{-1}$ , (2) 50, (3) 55.

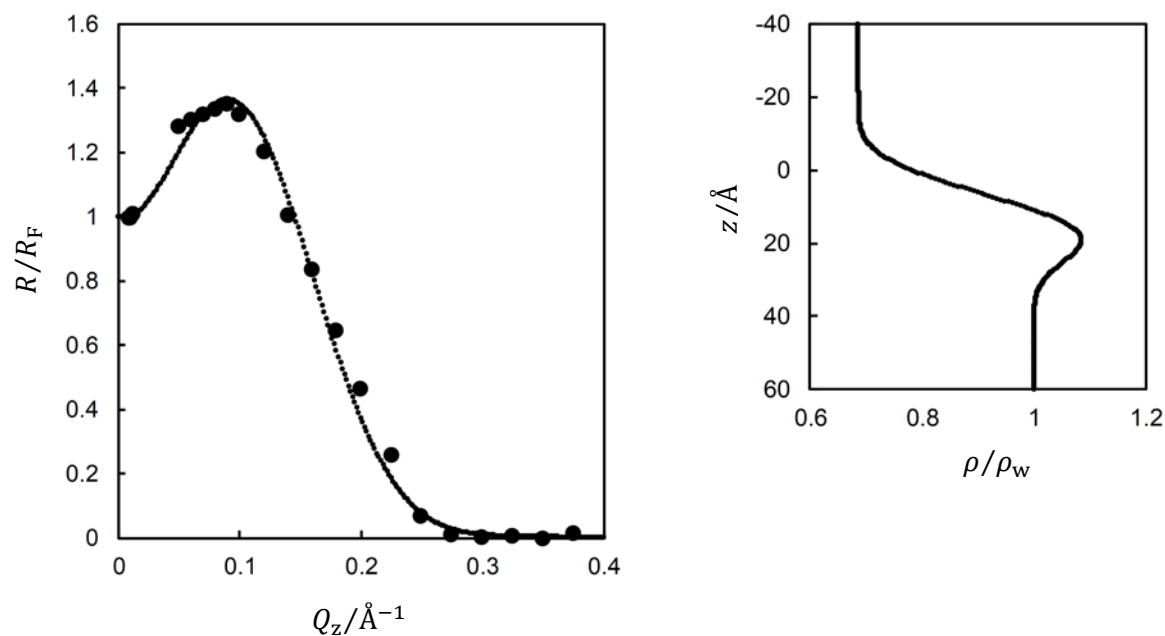

**Figure S6.** X-ray reflectivity vs. scattering vector normal to interface plot measured in condensed state of C14PC – Chol system at  $m_{PC} = 0.03 \text{ mmol kg}^{-1}$  and  $m_{Chol} = 2.0 \text{ mmol kg}^{-1}$ . Dotted line represent the curve fitted by three slab model. The electron density profile is shown in the right side figure.

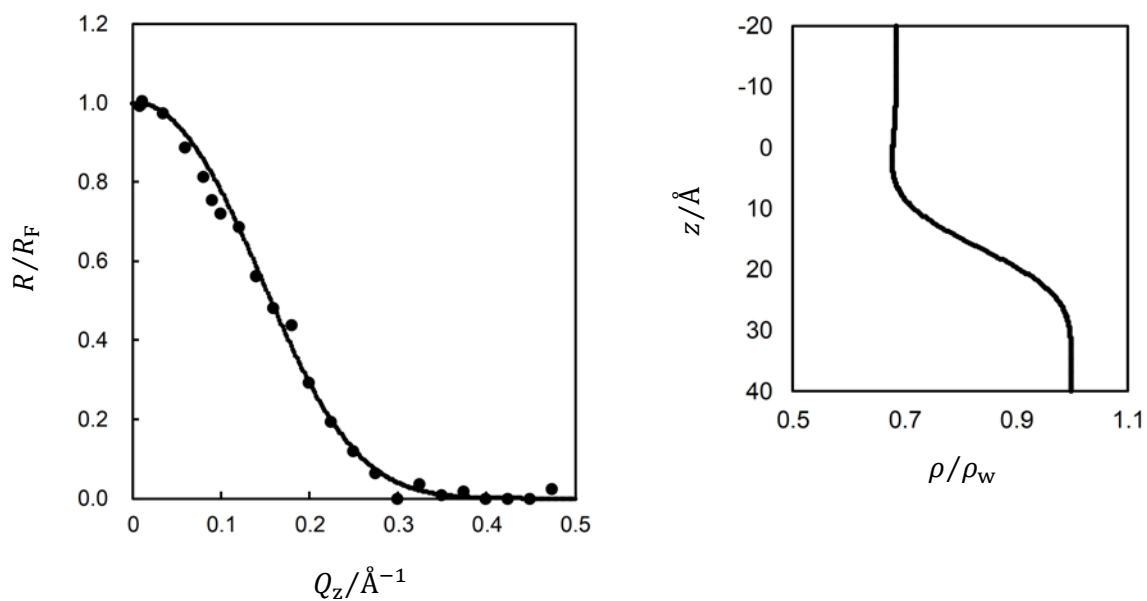

**Figure S7.** X-ray reflectivity vs. scattering vector normal to interface plot measured in expanded state of C14TAB – Chol system at  $m_{\text{TAB}} = 3.5 \text{ mmol kg}^{-1}$  and  $m_{\text{Chol}} = 0.3 \text{ mmol kg}^{-1}$ . Dotted line represent the curve fitted by three slab model. The electron density profile is shown in the right side figure.
